1                    On set-based association tests: insights from a  
2                    regression using summary statistics

3                    Yanyan Zhao<sup>1</sup> and Lei Sun<sup>1,2</sup>

<sup>1</sup>Department of Statistical Sciences, University of Toronto, 100 St. George  
Street, Toronto, Ontario M5S 3G3, Canada,

4                    [yanyan.zhao@utoronto.ca](mailto:yanyan.zhao@utoronto.ca)

5                    <sup>2</sup>Division of Biostatistics, Dalla Lana School of Public Health, University of  
6                    Toronto, 155 College Street, Toronto, Ontario M5T 3M7, Canada,

7                    [sun@utstat.toronto.edu](mailto:sun@utstat.toronto.edu)

8                    June 16, 2019

## 9 **Abstract**

10 Motivated by, but not limited to, association analyses of multiple genetic variants, we propose  
11 here a summary statistic-based regression framework. The proposed method requires only variant-  
12 specific summary statistics, and it unifies earlier methods based on individual-level data as spe-  
13 cial cases. The resulting score test statistic, derived from a linear mixed-effect regression model,  
14 inherently transforms the variant-specific statistics using the precision matrix to improve power  
15 for detecting sparse alternatives. Furthermore, the proposed method can incorporate additional  
16 variant-specific information with ease, facilitating omic-data integration. We study the asymptotic  
17 properties of the proposed tests under the null and alternatives, and we investigate efficient p-value  
18 calculation in finite samples. Finally, we provide supporting empirical evidence from extensive  
19 simulation studies and two applications.

20 *Keywords:* Correlated test statistics; Regression; Sparse alternatives; Set-based test; Summary  
21 statistics; SKAT-O.

## 22 **1 Introduction**

23 Set-based analyses of multiple variables are increasingly important in many current scientific stud-  
24 ies. For example, in modern genome-wide association studies (GWAS) and next-generation se-  
25 quencing (NGS) analyses, one might be interested in jointly analyzing multiple (rare) genetic  
26 variants influencing a complex, heritable trait (also known as gene- or pathway-based studies),  
27 identifying one genetic variants influencing multiple traits (also known as pleiotropy studies), or  
28 combining evidence from multiple studies as in the classical meta-analysis.

29 Without loss of generality, let us focus on set-based analyses of multiple rare genetic variants.  
30 In this setting, myriad statistical tests have been proposed, which fit into three general categories  
31 (Derkach et al., 2014; Lee et al., 2014): the linear or burden tests (e.g. Morgenthaler and Thilly  
32 (2007); Li and Leal (2008); Madsen and Browning (2009)), the quadratic or variance-component  
33 tests (e.g. Pan (2009); Neale et al. (2011); Wu and Lin (2011)), and the hybrid tests combining  
34 evidence from the linear and quadratic tests (e.g. Lee et al. (2012); Derkach et al. (2013)).

35 These earlier methods have been studied extensively, however, they can be improved in sev-  
36 eral aspects. First, these methods may not perform well in the sparse-signal setting where only a  
37 small proportion of the variants are true signals and variants are highly correlated (Xu et al., 2016).  
38 Second, individual/subject-level data may not be available due to logistical challenges or data con-  
39 fidentiality agreement, so it is beneficial to explicitly develop summary statistic-based association  
40 tests. In addition, it is important to ensure that summary statistic-based methods can also incor-  
41 porate additional covariates, such as variant-specific functional annotation information. Finally,  
42 earlier work have shown the performance of a simple minimum-p value approach (Derkach et al.,  
43 2013) is comparable with that of the optimal sequence kernel association test, SKAT-O (Lee et al.,  
44 2012). This suggests that a grid search for the ‘optimal’ weighting factor may not be necessary,  
45 and it is desirable to develop new robust hybrid test statistics with theoretically justified weights.

46 To this end, we propose a flexible and unifying linear mixed-effect regression model that

47 requires only variant-specific summary statistics, and we show that earlier methods based on  
48 individual-level data are special cases of the proposed testing framework. The statistics derived  
49 from the regression model (based on summary statistics) inherently transforms the variant-specific  
50 statistics using the precision matrix; this transformation has been proposed to increase signal  
51 strength when the signals are sparse in other settings (Fan et al., 2013; Cai et al., 2014). Thus,  
52 the proposed regression framework provides an intuitive way to utilize correlations among genetic  
53 variants to improve power for detecting sparse alternatives. Furthermore, the proposed method  
54 can incorporate additional variant-specific information as covariate(s). For example, the covariate  
55 could be the available functional annotation for the set of variants. Both our simulation studies and  
56 real data application show that we could have remarkable power gain when the included covariate  
57 contains useful information, while power loss is minimal when the covariate is uninformative.

58 Although the proposed method is motivated by jointly analyzing of multiple rare genetic vari-  
59 ants, the general set-based analytical framework can be used for other settings, for example,  
60 meta-analysis (Han and Eskin, 2011), PrediXcan incorporating association evidence with gene-  
61 expression data (Gamazon et al., 2015), and pleiotropy association study between one genetic  
62 variant and multiple phenotypes (Liu and Lin, 2018b). We will provide a detailed discussion on  
63 the differences and connections between the proposed method and the earlier work, as well as the  
64 additional utilities of the proposed method including enhancing the performance of polygenic risk  
65 score (Purcell et al., 2009).

66 The remainder of the paper is organized as follows. As a proof-of-principle for the proposed  
67 set-based regression approach, we first review existing association methods for analyzing a set of  
68 rare genetic variants based on individual-level data in Section 2. In Section 3, we outline the pro-  
69 posed regression framework based on summary statistics and derive a catalogue of association test  
70 statistics from fixed-, random-, or mixed-regression models. We then demonstrate the analytical  
71 equivalency between some of the new statistics and the existing ones for rare variants analyses,  
72 and we investigate efficient p-value calculation in finite samples and study asymptotic properties

73 of the tests. Finally, we discuss covariate adjustment. To provide supporting empirical evidence,  
74 we present numerical results from simulation studies in Section 4 and from two application studies  
75 in Section 5. We conclude with remarks and discussions in Section 6, and we give theoretical  
76 proofs and additional numerical studies in the supplementary material.

## 77 **2 Existing association tests for jointly analyzing a set of rare** 78 **genetic variants**

### 79 **2.1 Regression set-up using individual-level data**

Let  $\mathbf{y} = (y_1, \dots, y_n)'$  denote the phenotype values of  $n$  unrelated individuals, and for a set of  $J$  genetic variants of interest, let  $\mathbf{G}_i = (G_{i1}, G_{i2}, \dots, G_{iJ})'$ ,  $i = 1, \dots, n$ , denote the corresponding genotype data. Assume  $y_i$  follows an exponential family distribution with mean  $\mu_i$  and dispersion parameter  $\phi = 1$  (without loss of generality) given  $\mathbf{G}_i$ ,  $f(y_i|\mu_i) = \exp\{\boldsymbol{\theta}(\mu_i)y_i - b(\boldsymbol{\theta}_i) + c(y_i)\}$ , the corresponding generalized linear model is

$$g(\mu_i) = \beta_0 + \beta_1 G_{i1} + \dots + \beta_J G_{iJ}. \quad (1)$$

80 Individual-level covariate information such as age and sex, if available, should be added to the  
81 model but are omitted for the moment. This omission does not change the validity of the methods  
82 to be discussed, and for clarity of the presentation we also only consider canonical link functions  
83 in this paper.

To evaluate the phenotype-genotype association relationship, we are interested in testing the null hypothesis that  $H_0 : \boldsymbol{\beta} = (\beta_1, \dots, \beta_J)' = \mathbf{0}$ . Let  $\mathbf{G}_j = (G_{1j}, G_{2j}, \dots, G_{nj})'$  be the genotype vector for variant  $j$ ,  $j = 1, \dots, J$ , and  $\mathbf{G} = (\mathbf{G}_1, \dots, \mathbf{G}_J)$ , the corresponding score vector is  $\mathbf{s} = \mathbf{G}'(\mathbf{y} - \bar{\mu}_y \mathbf{1}_n)$ , where  $\mathbf{1}_n$  is a  $n \times 1$  unit vector and  $\bar{\mu}_y = \frac{1}{n} \sum_{i=1}^n y_i$ . The  $j$ th element of the score

function is  $s_j = \sum_i (y_i - \bar{\mu}_y) G_{ij}$ , which captures the linear relationship between phenotype  $\mathbf{y}$  and genotype  $\mathbf{G}_j$ . The variance-covariance matrix of  $\mathbf{s}$  is

$$\boldsymbol{\Sigma}_0 = g_1^{-1}(\bar{\mu}_y) \mathbf{G}' (I_n - \mathbf{1}_n \mathbf{1}_n' / n) \mathbf{G}, \quad (2)$$

84 where  $g_1(\cdot)$  denotes the first derivative of the link function  $g$ , and  $I_n$  is a identity matrix of size  $n$ .

## 85 **2.2 Existing methods based on the score vector $\mathbf{s}$**

86 Numerous methods have been proposed to evaluate  $H_0 : \boldsymbol{\beta} = (\beta_1, \dots, \beta_J)' = \mathbf{0}$ , among which  
 87 there are three popular classes, namely the burden or linear (e.g. Madsen and Browning (2009)),  
 88 variance-component or quadratic (e.g. Wu and Lin (2011)), and hybrid combing the linear and  
 89 quadratic (e.g. Lee et al. (2012)); see Derkach et al. (2014) for a review.

90 Although it is not always obvious, most test statistics are functions of  $\mathbf{s}$ . For example, the  
 91 original burden test (also known as the weighted-sum test) (Madsen and Browning, 2009) first  
 92 constructs a ‘super-variant’ for which the genotype is the weighted average across genotypes of  
 93 the  $J$  variants,  $G^* = \sum_{j=1}^J w_j G_{ij}$ , where  $\mathbf{w} = (w_1, w_2, \dots, w_J)'$  is a pre-specified weighting fac-  
 94 tor often associated with minor allele frequency (MAF); Madsen and Browning (2009) chose  
 95  $w_j = 1 / \sqrt{\text{MAF}_j(1 - \text{MAF}_j)}$ , while Morgenthaler and Thilly (2007) preferred equal weighting  
 96 using  $w_j = 1, j = 1, \dots, J$ . Burden type of tests then performs the phenotype-genotype associa-  
 97 tion analysis via regression,  $g(\mu_i) = \beta_0^* + \beta^* G^* = \beta_0^* + \beta^* \sum_{j=1}^J w_j G_{ij}$ , and testing  $H_0 : \beta^* = 0$ .  
 98 However, it is not difficult to show that the score test statistic derived from the above regression  
 99 using the ‘super-variant’  $G^*$  is proportional to  $T_1 = (\mathbf{w}' \mathbf{s})^2$ , where  $(\mathbf{w}' \boldsymbol{\Sigma}_0 \mathbf{w})^{-1} T_1$  is asymptotically  
 100 chi-square distributed with 1 degrees of freedom (d.f.),  $\chi_1^2$ .

101 This  $T_1$  test is also termed as CAST by Morgenthaler and Thilly (2007), the sum test by Pan  
 102 (2009), and the linear-class test by Derkach et al. (2014), among others. Because  $T_1$  is based on  
 103 the weighted average of  $s_j$  and  $s_j$  can be positive or negative depending on the direction of effect

104 (i.e. sign of  $\beta_j$  in model (1)),  $T_1$  is only powerful when a large proportion of variants are causal  
105 *and* effects are in the same direction.

106 Variance-component tests, such as SKAT (Wu and Lin, 2011), SSU (Pan, 2009), and C-alpha  
107 (Neale et al., 2011), offer an alternative approach that belongs to the quadratic class of tests  
108 (Derkach et al., 2014). Again, although most of the original tests started with the regression model  
109 (1), this class of tests can be formulated as  $T_2 = \mathbf{s}'\mathbf{A}\mathbf{s}$ , where  $\mathbf{A}$  is a positive or semi-definite sym-  
110 metric matrix, and  $T_2$  asymptotically follows a weighted chi-square distribution. For example,  
111 Derkach et al. (2014) has noted that  $\mathbf{A} = \mathbf{I}$  leads to C-alpha of Neale et al. (2011) and SSU of Pan  
112 (2009), while  $\mathbf{A} = \text{diag}\{a_1, \dots, a_J\}$  leads to SKAT of Wu and Lin (2011), where  $a_j$  depends on  
113 the MAF of variant  $j$ ; see Table 1 of Derkach et al. (2014) for a summary. These quadratic tests  
114 are robust to heterogenous effect directions, but they are less powerful than linear tests when most  
115 variants are causal and with the same direction of effects.

116 Since the true genetic model is unknown, omnibus hybrid tests combining  $T_1$  and  $T_2$  tests  
117 have been proposed. For example, Lee et al. (2012) proposed SKAT-O, a weighted linear  
118 combination of a burden-type of test and SKAT,  $Q_\rho = \rho(\mathbf{w}'\mathbf{s})^2 + (1 - \rho)\mathbf{s}'\mathbf{A}\mathbf{s} = \rho T_1 + (1 - \rho)T_2$ ,  
119 where  $\rho$  can be interpreted as the unknown pairwise correlation between  $\beta_j$  under the alternative,  
120  $\mathbf{A} = \text{diag}\{w_1^2, \dots, w_J^2\}$ , and  $w_j$  depends on the MAF of variant  $j$ ,  $j = 1, \dots, J$ . A grid search for the  
121 ‘optimal’  $\rho$  is then performed,  $0 = \rho_1 < \rho_2 < \dots < \rho_m = 1$ . Let  $p_\rho$  be the corresponding p-value  
122 based on  $Q_\rho$ , the test statistic for SKAT-O is  $T_{skato} = \min\{p_{\rho_1}, \dots, p_{\rho_m}\}$ . The asymptotic p-value  
123 of  $T_{skato}$  can be calculated with one-dimensional numerical integration.

124 Instead of considering data-driven ‘optimal’  $\rho$  then adjusting for the inherent selection bias,  
125 Derkach et al. (2013) proposed two simpler yet competitive hybrid test statistics,  $T_{Fisher}$  and  $T_{Minp}$ .  
126 Let  $p_{T_1}$  and  $p_{T_2}$  be the p-values corresponding to  $T_1$  and  $T_2$ , respectively, the Fisher and Minp  
127 statistics take the form of  $T_{Fisher} = -2\log(p_{T_1}) - 2\log(p_{T_2})$ ,  $T_{Minp} = \min\{p_{T_1}, p_{T_2}\}$ . If  $p_{T_1}$  and  $p_{T_2}$   
128 are asymptotically independent under the null hypothesis,  $T_{Fisher}$  has an asymptotic distribution of  
129  $\chi_4^2$ , and  $T_{Minp}$  has an asymptotic distribution of  $Beta(1, 2)$ .

130 Previous work have shown that  $T_{Minp}$  and  $T_{skato}$  perform similarly, and they are slightly more  
131 powerful than  $T_{Fisher}$  when  $T_1$  has no power (Derkach et al., 2013). In contrast,  $T_{Fisher}$  has better  
132 power than  $T_{Minp}$  and  $T_{skato}$  when both  $T_1$  and  $T_2$  have some power. However, we expect all three  
133 hybrid tests to have little power under sparse alternatives (Donoho and Jin, 2004; Barnett et al.,  
134 2017) when only a small proportion of variants in the set is causal.

135 To improve performance, we first note that if variants are correlated with each other, we can  
136 consider for example  $\Sigma_0^{-1}\mathbf{s}$  instead of  $\mathbf{s}$  in constructing a more powerful test under sparse alterna-  
137 tives. Second, it is clear that we only need variant-specific summary statistics  $\mathbf{s} = (s_1, \dots, s_J)'$  for  
138 jointly analyzing the  $J$  variants of interest. Further, the fact that  $T_{Minp}$  and  $T_{skato}$  having similar  
139 performance suggests that a grid search for  $\rho$  might not be necessary, and an easy-to-compute yet  
140 theoretically justified ‘optimal’  $\rho$  could exist. Lastly, when additional variant-specific information  
141  $z_j$  (e.g. variant  $j$  being non-synonymous or not) is available, we can improve power by incorpo-  
142 rating  $z_j, j = 1, \dots, J$ . Intuitively we can achieve this by modifying  $w_j$  proportional to  $z_j$ , but a  
143 less add-hoc approach is desirable. To this end, we will consider a flexible and unifying regression  
144 framework that (i) requires only  $s_j$  and  $\Sigma_0$ , (ii) yields  $T_1$  and  $T_2$ , and hybrid statistics similar to  
145  $T_{skato}$  as special cases, and (iii) provides new test statistics that incorporate the precision matrix  
146  $\Sigma_0^{-1}$  if desired, as well as account for covariate information  $z_j, j = 1, \dots, J$ , if available.

### 147 **3 A regression framework based on summary statistics**

148 Here we assume  $\mathbf{s} = (s_1, \dots, s_J)'$  is available, summarizing the association relationship between  
149 the phenotype of interest and a set of  $J$  genetic variants as detailed in Section 2. We also assume  
150 that  $\Sigma_0$  is known or estimated accurately from a reference panel. We let  $\mathbf{z} = (z_1, \dots, z_J)'$  represent  
151 variant-specific information available (Ionita-Laza et al., 2016), which can be multi-dimensional  
152 but assumed to be one single covariate for notation simplicity.



### 153 3.1 Fixed-effect and random-effect models

We first consider a fixed-effect (FE) model that models the common effect present among  $s_j, j = 1, \dots, J$ ,

$$\mathbf{s} = \mu \mathbf{w} + \boldsymbol{\varepsilon}, \quad (3)$$

where  $\mathbf{w} = (w_1, \dots, w_J)'$ ,  $\boldsymbol{\varepsilon} = (\varepsilon_1, \dots, \varepsilon_J)'$ , and  $\boldsymbol{\varepsilon} \sim N(\mathbf{0}, \boldsymbol{\Sigma}_0)$ . Based on this model, we aim to test  $H_0 : \mu = 0$ , and the corresponding score test statistic is

$$T_{FE} = (\mathbf{w}'\boldsymbol{\Sigma}_0^{-1}\mathbf{w})^{-1} (\mathbf{w}'\boldsymbol{\Sigma}_0^{-1}\mathbf{s})^2. \quad (4)$$

154 The equivalence between  $(\mathbf{w}'\boldsymbol{\Sigma}_0\mathbf{w})^{-1} T_1 (= (\mathbf{w}'\boldsymbol{\Sigma}_0\mathbf{w})^{-1} (\mathbf{w}'\mathbf{s})^2)$  in Section 2 and  $T_{FE}$  above is ap-  
155 parent, if we let  $w$  in  $T_{FE}$  to be  $\boldsymbol{\Sigma}_0\mathbf{w}$  (Table 1).

Alternatively, we can consider the following random effect (RE) model,

$$\mathbf{s} = \boldsymbol{\eta} + \boldsymbol{\varepsilon}, \quad (5)$$

where  $\boldsymbol{\eta} \sim N(\mathbf{0}, \tau^2\mathbf{R})$ ,  $\mathbf{R}$  is a predefined positive or semi-definite symmetric matrix, and  $\boldsymbol{\varepsilon} \sim N(\mathbf{0}, \boldsymbol{\Sigma}_0)$ . If we test the following hypothesis,  $H_0 : \tau^2 = 0$ , the corresponding score test statistic is

$$T_{RE} = \left(2tr(\boldsymbol{\Sigma}_0^{-1}\mathbf{R})\right)^{-1/2} (\mathbf{s}'\boldsymbol{\Sigma}_0^{-1}\mathbf{R}\boldsymbol{\Sigma}_0^{-1}\mathbf{s} - tr(\boldsymbol{\Sigma}_0^{-1}\mathbf{R})) = c_2^{-1/2}(Q(\mathbf{s}) - c_1), \quad (6)$$

156 where  $c_1 = tr(\boldsymbol{\Sigma}_0^{-1}\mathbf{R})$  is the mean of  $Q(\mathbf{s})$  and  $c_2 = 2tr(\boldsymbol{\Sigma}_0^{-1}\mathbf{R})^2$  is the variance of  $Q(\mathbf{s})$ . The  
157 analytical equivalence between  $T_2 = \mathbf{s}'\mathbf{A}\mathbf{s}$  and  $Q(\mathbf{s}) = \mathbf{s}'\boldsymbol{\Sigma}_0^{-1}\mathbf{R}\boldsymbol{\Sigma}_0^{-1}\mathbf{s}$  (the key element of  $T_{RE}$ ) is  
158 also apparent, if we let  $\mathbf{R} = \boldsymbol{\Sigma}_0\mathbf{A}\boldsymbol{\Sigma}_0$  (Table 1). In addition, if we let  $\mathbf{R} = \boldsymbol{\Sigma}_0\mathbf{W}\mathbf{R}_\rho\mathbf{W}\boldsymbol{\Sigma}_0$ , where  
159  $\mathbf{W} = \text{diag}\{w_j\}$  and  $\mathbf{R}_\rho = \rho\mathbf{1}_J\mathbf{1}'_J + (1 - \rho)\mathbf{I}_J$ , then  $Q(\mathbf{s}) = \rho T_1 + (1 - \rho)T_2 = Q_\rho$ , the key element  
160 of  $T_{skato}$ .

## 161 3.2 Mixed-effect model

The fixed-effect model (3) captures the common underlying effect, while the random-effect model (5) accounts for potential heterogeneity. A logical next step to consider a mixed-effect (ME) modelling framework that includes models (3) and (5) as special cases,

$$\mathbf{s} = \mu \mathbf{w} + \boldsymbol{\eta} + \boldsymbol{\varepsilon}, \quad (7)$$

where  $\boldsymbol{\eta} \sim N(0, \tau^2 \mathbf{R})$  and  $\boldsymbol{\varepsilon} \sim N(0, \boldsymbol{\Sigma}_0)$ . If we test the following null hypothesis,

$$H_0 : \mu = 0, \tau^2 = 0, \quad (8)$$

the corresponding score vector is  $(\mathbf{w}'\boldsymbol{\Sigma}_0^{-1}\mathbf{s}, \frac{1}{2}\mathbf{s}'\boldsymbol{\Sigma}_0^{-1}\mathbf{R}\boldsymbol{\Sigma}_0^{-1}\mathbf{s} - \frac{1}{2}tr(\boldsymbol{\Sigma}_0^{-1}\mathbf{R}))'$ , and the test statistic is

$$T_{ME} = (\mathbf{w}'\boldsymbol{\Sigma}_0^{-1}\mathbf{w})^{-1} (\mathbf{w}'\boldsymbol{\Sigma}_0^{-1}\mathbf{s})^2 + c_2^{-1} (\mathbf{s}'\boldsymbol{\Sigma}_0^{-1}\mathbf{R}\boldsymbol{\Sigma}_0^{-1}\mathbf{s} - c_1)^2, \quad (9)$$

162 where  $c_1 = tr(\boldsymbol{\Sigma}_0^{-1}\mathbf{R})$  and  $c_2 = 2tr(\boldsymbol{\Sigma}_0^{-1}\mathbf{R})^2$  as before for  $T_{RE}$ .

Intuitively, following the construction of  $T_{ME}$ , we can also consider another hybrid test statistic,  $T_{12}$ , by combining  $T_1 = (\mathbf{w}'\mathbf{s})^2$  and  $T_2 = \mathbf{s}'\mathbf{A}\mathbf{s}$  weighted by the corresponding standard deviations,

$$T_{12} = (\mathbf{w}'\boldsymbol{\Sigma}_0\mathbf{w})^{-1} (\mathbf{w}'\mathbf{s})^2 + \check{c}_2^{-1} (\mathbf{s}'\mathbf{A}\mathbf{s} - \check{c}_1)^2 \quad (10)$$

163 where  $\check{c}_1 = tr(\boldsymbol{\Sigma}_0\mathbf{A})$  is the mean of  $T_2$  under the null and  $\check{c}_2 = 2tr(\boldsymbol{\Sigma}_0\mathbf{A})^2$  is the variance of  $T_2$ .

164 The connection between  $T_{12}$  with  $T_{skato}$  is also immediate. However, there are two key differences.

165 First, given a  $\rho$ ,  $T_{skato}$  relies on  $Q_\rho = \rho(\mathbf{w}'\mathbf{s})^2 + (1 - \rho)\mathbf{s}'\mathbf{A}\mathbf{s} = \rho T_1 + (1 - \rho)T_2$ . In contrast,  $T_{12}$

166 combines  $T_1$  and the *square* of *centralized*  $T_2$  (not  $T_2$  itself). That is,  $T_{12} = \sqrt{2}sd_{T_1}^{-1} T_1 + (sd_{T_2}^{-1} (T_2 -$   
167  $mean_{T_2}))^2$ . Secondly,  $T_{skato}$  searches for the ‘optimal’  $\rho$  that minimizes the p-value associated with

168  $Q_\rho$  then adjusts for selection bias. In contrast,  $T_{12}$  uses the corresponding variances. Lastly, we

169 note that when  $J$  is large, centralized  $T_2$  is approximately normally distributed with mean zero  
 170 under the null. Thus  $(\text{sd}_{T_2}^{-1} (T_2 - \text{mean}_{T_2}))^2$  is  $\chi_1^2$  distributed asymptotically, and it is on the same  
 171 scale as  $\text{sd}_{T_1}^{-1} T_1$ .

172 The score test statistic derived directly from the mixed-effect model (7) is  $T_{ME}$ , which uses  
 173  $\Sigma_0^{-1} \mathbf{s}$ , instead of  $\mathbf{s}$ , to account for the correlation between the tested variants. Transforming  $\mathbf{s}$  by  
 174 the precision matrix has been considered previously in other settings, for example, by Cai et al.  
 175 (2014) for a two-sample high-dimensional means test. As illustrated in Cai et al. (2014), the  
 176 transformation could improve power under sparse alternatives in the presence of high correlation.

Inspired by Hall and Jin (2010), we can also consider Cholesky decomposition of  $\Sigma_0$ ,  $\mathbf{C}\Sigma_0\mathbf{C}' = \mathbf{I}_J$ , and use  $\mathbf{C}\mathbf{s}$  instead of  $\mathbf{s}$ . This will result in another new hybrid test statistic,

$$\tilde{T}_{ME} = (\mathbf{w}'\mathbf{w})^{-1} (\mathbf{w}'\mathbf{C}\mathbf{s})^2 + (2\text{tr}(\mathbf{R}^2))^{-1} (\mathbf{s}'\mathbf{C}'\mathbf{R}\mathbf{C}\mathbf{s} - \text{tr}(\mathbf{R}))^2. \quad (11)$$

177 In the two-class classification context, Fan et al. (2013) has shown that  $\Sigma_0^{-1}$  leads to better perfor-  
 178 mance than  $\mathbf{C}$ . In our setting, we will study both  $T_{ME}$  and  $\tilde{T}_{ME}$  for completeness.

### 179 3.3 Additional covariate adjustment

180 Increasingly, additional variant-specific information,  $\mathbf{z} = (z_1, \dots, z_J)$ , such as functional annotation  
 181 or gene-expression evidence are available and should be utilized to increase power (Finucane et al.,  
 182 2015). One could consider directly modifying  $\mathbf{w}$  to reflect the additional information, but a princi-  
 183 pled approach is lacking. The proposed regression framework, however, can naturally incorporate  
 184  $\mathbf{z}$  as a covariate into the mixed-effect model (7),

$$\mathbf{s} = \mu\mathbf{w} + \theta\mathbf{z} + \boldsymbol{\eta} + \boldsymbol{\varepsilon}. \quad (12)$$

If we are interested in testing,  $H_0 : \mu = 0, \theta = 0, \tau^2 = 0$ , the corresponding score test statistic

is

$$T_{ME, cov} = \mathbf{s}'\boldsymbol{\Sigma}_0^{-1}\mathbf{u}(\mathbf{u}'\boldsymbol{\Sigma}_0^{-1}\mathbf{u})^{-1}\mathbf{u}'\boldsymbol{\Sigma}_0^{-1}\mathbf{s} + c_2^{-1}(\mathbf{s}'\boldsymbol{\Sigma}_0^{-1}\mathbf{R}\boldsymbol{\Sigma}_0^{-1}\mathbf{s} - c_1)^2, \quad (13)$$

185 where  $\mathbf{u} = (\mathbf{w}, \mathbf{z})$ ,  $c_1 = \text{tr}(\boldsymbol{\Sigma}_0^{-1}\mathbf{R})$ , and  $c_2 = 2\text{tr}(\boldsymbol{\Sigma}_0^{-1}\mathbf{R})^2$ . Similarly as before, we can construct  
 186  $T_{12, cov}$  and  $\tilde{T}_{ME, cov}$  versions of  $T_{12}$  and  $\tilde{T}_{ME}$  that account for covariate information, but for a more  
 187 focused study we will not examine the difference between these tests here. Table 1 summarizes all  
 188 the tests discussed so far.

### 189 3.4 Asymptotic distributions of the proposed test statistics

190 The asymptotic distributions of the existing tests,  $T_1$ ,  $T_2$ ,  $T_{skato}$ ,  $T_{Fisher}$ , and  $T_{Minp}$ , have been pre-  
 191 viously established as  $n \rightarrow \infty$ , assuming that individual-level data are available. Here, we are  
 192 interested in the asymptotic distribution of the various tests when  $J \rightarrow \infty$ . In the next section,  
 193 we will study finite sample behaviour of the tests. We begin with some mild conditions needed  
 194 for Theorem 1. For two sequences of real numbers  $\{a_{1J}\}$  and  $\{a_{2J}\}$ , denote  $a_{1J} = o(a_{2J})$  if  
 195  $\lim_{J \rightarrow \infty}(a_{1J}/a_{2J}) = 0$ , and  $\mathbf{C}\boldsymbol{\Sigma}_0\mathbf{C}' = \mathbf{I}_J$ .

196 **Condition 1.** Let  $b_j$  be the  $j_{th}$  element of the vector  $\mathbf{b}$ ,  $j = 1, \dots, J$ , where  $\mathbf{b} = \mathbf{w}'\mathbf{C}'$ , and let  $\lambda_j$  be  
 197 the  $j_{th}$  eigenvalue of the matrix  $\mathbf{C}\mathbf{R}\mathbf{C}'$ ,  $j = 1, \dots, r$ . Denote  $b_{max} = \max_j b_j$  and  $\lambda_{max} = \max_j \lambda_j$ .  
 198  $b_{max} = o\left(\sqrt{\mathbf{w}'\boldsymbol{\Sigma}_0^{-1}\mathbf{w}}\right)$  and  $\lambda_{max} = o\left(\sqrt{\text{tr}(\mathbf{R}\boldsymbol{\Sigma}_0^{-1})^2}\right)$ .

199 **Condition 2.** Let  $\check{b}_j$  be the  $j_{th}$  element of the vector  $\check{\mathbf{b}}$ ,  $j = 1, \dots, J$ , where  $\check{\mathbf{b}} = \mathbf{w}'\mathbf{C}^{-1}$ , and let  
 200  $\check{\lambda}_j$  be the  $j_{th}$  eigenvalue of the matrix  $(\mathbf{C}^{-1})'\mathbf{R}\mathbf{C}^{-1}$ ,  $j = 1, \dots, r$ . Denote  $\check{b}_{max} = \max_j \check{b}_j$  and  
 201  $\check{\lambda}_{max} = \max_j \check{\lambda}_j$ .  $\check{b}_{max} = o\left(\sqrt{\mathbf{w}'\boldsymbol{\Sigma}_0\mathbf{w}}\right)$  and  $\check{\lambda}_{max} = o\left(\sqrt{\text{tr}(\mathbf{R}\boldsymbol{\Sigma}_0)^2}\right)$ .

202 **Condition 3.** Let  $\tilde{\lambda}_j$  be the  $j_{th}$  eigenvalue of the matrix  $\mathbf{R}$ ,  $j = 1, \dots, r$ . Denote  $w_{max} = \max_j w_j$   
 203 and  $\tilde{\lambda}_{max} = \max_j \tilde{\lambda}_j$ .  $w_{max} = o\left(\sqrt{\mathbf{w}'\mathbf{w}}\right)$  and  $\tilde{\lambda}_{max} = o\left(\sqrt{\text{tr}(\mathbf{R}^2)}\right)$ .

204 **Theorem 1.** Under the null hypothesis of (8),

Table 1: **Summary of different test statistics for analyzing a set of genetic variants.**  $\mathbf{s} = (s_1, \dots, s_J)$  is a vector of summary association statistics for  $J$  genetic variants,  $\mathbf{w}$  is a vector of weights,  $\Sigma_0$  is a known or estimated variance-covariance matrix for  $\mathbf{s}$ , and  $\mathbf{R}$  and  $\mathbf{A}$  are positive definite (or semi-definite) symmetric matrices. “The equivalence can be analytical or numerical; see corresponding sessions for details. See Table 1 of Derkach et al. (2014) for a more detailed summary of the previous methods.

| Proposed Approach                                                                                                                                                                 |                                                        | Equivalence <sup>a</sup> with previous methods based on individual-level data                                                                                               |
|-----------------------------------------------------------------------------------------------------------------------------------------------------------------------------------|--------------------------------------------------------|-----------------------------------------------------------------------------------------------------------------------------------------------------------------------------|
| Regression Models                                                                                                                                                                 | Test statistics                                        | Methods                                                                                                                                                                     |
| <b>Fixed-effect Model, Section 3.1</b>                                                                                                                                            |                                                        |                                                                                                                                                                             |
| $\mathbf{s} = \mu\mathbf{w} + \boldsymbol{\varepsilon}, \boldsymbol{\varepsilon} \sim N(\mathbf{0}, \Sigma_0)$ (3)<br>$H_0 : \mu = 0$                                             | $T_{FE}$ (4)                                           | Linear $T_1$<br>let $\mathbf{w}$ be $\Sigma_0\mathbf{w}$<br>CAST, Morgenthaler and Thilly (2007)<br>Sum-test/burden, Pan (2009)<br>Weighted-sum, Madsen and Browning (2009) |
| <b>Random-effect Model, Section 3.1</b>                                                                                                                                           |                                                        |                                                                                                                                                                             |
| $\mathbf{s} = \boldsymbol{\eta} + \boldsymbol{\varepsilon}, \boldsymbol{\eta} \sim N(\mathbf{0}, \tau^2\mathbf{R})$ (5)<br>$H_0 : \tau^2 = 0$                                     | $T_{RE}$ (6)                                           | Quadratic $T_2$<br>let $\mathbf{R}$ be $\Sigma_0\mathbf{A}\Sigma_0$<br>SSU, Pan (2009)<br>C-alpha, Neale et al. (2011)<br>SKAT, Wu and Lin (2011)                           |
| <b>Mixed-effect Model, Section 3.2</b>                                                                                                                                            |                                                        |                                                                                                                                                                             |
| $\mathbf{s} = \mu\mathbf{w} + \boldsymbol{\eta} + \boldsymbol{\varepsilon}$ (7)<br>$H_0 : \mu = 0, \tau^2 = 0$                                                                    | $T_{ME}$ (9)<br>$T_{12}$ (10)<br>$\tilde{T}_{ME}$ (11) | Hybrid $T_1$ ‘+’ $T_2$<br><br>$T_{skato}$ , Lee et al. (2012)<br>$T_{Fisher}$ , $T_{Mimp}$ , Derkach et al. (2013)                                                          |
| <b>Covariate Adjustment, Section 3.3</b>                                                                                                                                          |                                                        |                                                                                                                                                                             |
| $\mathbf{s} = \mu\mathbf{w} + \boldsymbol{\theta}\mathbf{z} + \boldsymbol{\eta} + \boldsymbol{\varepsilon}$ (12)<br>$H_0 : \mu = 0, \boldsymbol{\theta} = \mathbf{0}, \tau^2 = 0$ | $T_{ME,cov}$ (13)                                      |                                                                                                                                                                             |

205 (a) Assume Condition 1 holds, then,  $T_{ME} \xrightarrow{d} \chi_2^2$ , as  $J \rightarrow \infty$ .

206 (b) Assume Condition 2 holds, then,  $T_{12} \xrightarrow{d} \chi_2^2$ , as  $J \rightarrow \infty$ .

207 (c) Assume Condition 3 holds, then,  $\tilde{T}_{ME} \xrightarrow{d} \chi_2^2$ , as  $J \rightarrow \infty$ .

208 When  $J$  is small, significance evaluation based on the above asymptotic distributions may not  
 209 be adequate. In Theorem 2 we provide an approximation for the finite-sample distribution of  $T_{ME}$ ;  
 210 results for  $T_{12}$ , and  $\tilde{T}_{ME}$  are similar. Note that the main computational cost involved in Theorem 2  
 211 is the calculation of eigenvalues  $\lambda_j, j = 1, \dots, J$ .

212 **Theorem 2.** Let  $\lambda_j$  be the  $j$ th eigenvalue of the matrix  $\mathbf{C}\mathbf{R}\mathbf{C}'$ ,  $j = 1, \dots, r$ , then

$$T_{ME} \stackrel{\mathcal{D}}{=} u_1^2 + \left( 2 \sum_{j=1}^r \lambda_j^2 \right)^{-1} \left( \sum_{j=1}^r \lambda_j (v_j^2 - 1) \right)^2,$$

213 where  $u_1$  and  $v_j, j = 1, \dots, r$ , are independent  $N(0, 1)$ , and  $\stackrel{\mathcal{D}}{=}$  denotes equality in distribution.

214 We note that the above finite and asymptotic results are with respect to  $J$ . The validities of  $T_{ME}$ ,  
 215  $T_{12}$ , and  $\tilde{T}_{ME}$  do not require  $n \rightarrow \infty$  explicitly, as long as  $\mathbf{s}$  is multivariate normal. The distributions  
 216 of the existing tests,  $T_1, T_2, T_{skato}, T_{Fisher}$ , and  $T_{Minp}$  for finite  $J$  have been established. As  $J \rightarrow \infty$ ,  
 217 it is easy to show that both  $T_1$  and  $T_2$  are asymptotically  $\chi_1^2$  distributed under some mild conditions  
 218 that are similar to the ones specified above. The constructions of  $T_{skato}, T_{Fisher}$ , and  $T_{Minp}$  depend  
 219 on p-values of  $Q_\rho, T_1$ , or  $T_2$ , thus we do not pursue their asymptotic distributions with respect to  $J$ .

### 220 3.5 Power comparison

221 We first establish the asymptotic distributions of  $T_{ME}, T_{12}$ , and  $\tilde{T}_{ME}$  (as  $J \rightarrow \infty$ ) under the alterna-  
 222 tive,  $H_1 : \mu = \mu_1, \tau^2 = \tau_1^2$ , requiring some mild conditions on the  $\mathbf{w}, \mathbf{R}, \mathbf{\Sigma}_0$  as specified in Theorem  
 223 3.

224 **Condition 4.** Let  $\lambda_j$  be the  $j_{th}$  eigenvalue of the matrix  $\mathbf{CRC}'$ ,  $j = 1, \dots, r$ .  $c^{-1} \leq \lambda_{min} \leq \lambda_{max} \leq c$   
 225 for some constant  $c > 0$ .

226 **Theorem 3.** Under the alternative hypothesis  $H_1$ ,

227 (a) Assume Conditions 1 and 4 hold, then

$$T_{ME} \xrightarrow{d} \pi_0^2 \chi_1^2 (\varphi_0^2 / \pi_0^2) + \pi_1^2 \chi_1^2 ((\varphi_1 + \varphi_2)^2 / \pi_1^2), \text{ as } J \rightarrow \infty,$$

228 where  $\varphi_0 = \mu_1 \sqrt{\mathbf{w}' \boldsymbol{\Sigma}_0^{-1} \mathbf{w}}$ ,  $\varphi_1 = 2^{-1/2} \tau_1^2 \sqrt{\text{tr}(\boldsymbol{\Sigma}_0^{-1} \mathbf{R})^2}$ ,  $\varphi_2 = \mu_1^2 \mathbf{w}' \boldsymbol{\Sigma}_0^{-1} \mathbf{R} \boldsymbol{\Sigma}_0^{-1} \mathbf{w} / \sqrt{2 \text{tr}(\boldsymbol{\Sigma}_0^{-1} \mathbf{R})^2}$ ,  
 229  $\pi_0^2 = 1 + \tau_1^2 \mathbf{w}' \boldsymbol{\Sigma}_0^{-1} \mathbf{R} \boldsymbol{\Sigma}_0^{-1} \mathbf{w} / \mathbf{w}' \boldsymbol{\Sigma}_0^{-1} \mathbf{w}$ , and  $\pi_1^2 = 1 + (\tau_1^4 \text{tr}(\boldsymbol{\Sigma}_0^{-1} \mathbf{R})^4 + 2 \tau_1^2 \text{tr}(\boldsymbol{\Sigma}_0^{-1} \mathbf{R})^3) / \text{tr}(\boldsymbol{\Sigma}_0^{-1} \mathbf{R})^2$ .

230 (b) Assume Conditions 2 and 4 hold, then

$$T_{12} \xrightarrow{d} \check{\pi}_0^2 \chi_1^2 (\check{\varphi}_0^2 / \check{\pi}_0^2) + \check{\pi}_1^2 \chi_1^2 ((\check{\varphi}_1 + \check{\varphi}_2)^2 / \check{\pi}_1^2), \text{ as } J \rightarrow \infty,$$

231 where  $\check{\varphi}_0 = \mu_1 \mathbf{w}' \mathbf{w} / \sqrt{\mathbf{w}' \boldsymbol{\Sigma}_0 \mathbf{w}}$ ,  $\check{\varphi}_1 = \tau_1^2 \text{tr}(\mathbf{R}^2) / \sqrt{2 \text{tr}(\boldsymbol{\Sigma}_0 \mathbf{R})^2}$ ,  $\check{\varphi}_2 = \mu_1^2 \mathbf{w}' \mathbf{R} \mathbf{w} / \sqrt{2 \text{tr}(\boldsymbol{\Sigma}_0 \mathbf{R})^2}$ ,  $\check{\pi}_0^2 =$   
 232  $1 + \tau_1^2 \mathbf{w}' \mathbf{R} \mathbf{w} / \mathbf{w}' \boldsymbol{\Sigma}_0 \mathbf{w}$ , and  $\check{\pi}_1^2 = 1 + (\tau_1^4 \text{tr}(\mathbf{R}^4) + 2 \tau_1^2 \text{tr}(\boldsymbol{\Sigma}_0 \mathbf{R}^3)) / \text{tr}(\boldsymbol{\Sigma}_0 \mathbf{R})^2$ .

233 (c) Assume Conditions 3 and 4 hold, then

$$\tilde{T}_{ME} \xrightarrow{d} \tilde{\pi}_0^2 \chi_1^2 (\tilde{\varphi}_0^2 / \tilde{\pi}_0^2) + \tilde{\pi}_1^2 \chi_1^2 ((\tilde{\varphi}_1 + \tilde{\varphi}_2)^2 / \tilde{\pi}_1^2), \text{ as } J \rightarrow \infty,$$

234 where  $\tilde{\varphi}_0 = \mu_1 \mathbf{w}' \mathbf{C} \mathbf{w} / \sqrt{\mathbf{w}' \mathbf{w}}$ ,  $\tilde{\varphi}_1 = \tau_1^2 \text{tr}(\mathbf{CRC}' \mathbf{R}) / \sqrt{2 \text{tr}(\mathbf{R}^2)}$ ,  $\tilde{\varphi}_2 = \mu_1^2 \mathbf{w}' \mathbf{C}' \mathbf{R} \mathbf{C} \mathbf{w} / \sqrt{2 \text{tr}(\mathbf{R}^2)}$ ,  
 235  $\tilde{\pi}_0^2 = 1 + \tau_1^2 \mathbf{w}' \mathbf{C} \mathbf{R} \mathbf{C}' \mathbf{w} / \mathbf{w}' \mathbf{w}$ , and  $\tilde{\pi}_1^2 = 1 + (\tau_1^4 \text{tr}(\mathbf{R} \mathbf{C} \mathbf{R} \mathbf{C}')^2 + 2 \tau_1^2 \text{tr}(\mathbf{R} \mathbf{C} \mathbf{R} \mathbf{C}' \mathbf{R})) / \text{tr}(\mathbf{R}^2)$ .

236 To compare the asymptotic power between  $T_{ME}$  and  $T_{12}$ , first let us consider the simple case of  
 237 no random effect, i.e.  $\tau_1 = 0$ . In that case,  $\pi_0 = \check{\pi}_0 = \pi_1 = \check{\pi}_1 = 1$ . Thus  $T_{ME}$  is reduced to  $T_{FE}$ ,  
 238 and  $T_{12}$  is reduced to  $(\mathbf{w}' \boldsymbol{\Sigma}_0 \mathbf{w})^{-1} T_1$  based on Theorem 3. Further,  $T_{ME}$  is at least as powerful as  $T_{12}$   
 239 provided that  $\varphi_0^2 / \check{\varphi}_0^2 = \mathbf{w}' \boldsymbol{\Sigma}_0 \mathbf{w} \mathbf{w}' \boldsymbol{\Sigma}_0^{-1} \mathbf{w} / (\mathbf{w}' \mathbf{w})^2 \geq 1$ . In fact, the above inequality always holds as

240 long as  $\Sigma_0$  is a positive definite symmetric matrix. This reveals that if the true underlying model  
 241 for  $\mathbf{s}$  is a fixed-effect model, then  $T_{ME}$  is more powerful than  $T_{12}$ . Our analytical conclusion here  
 242 is consistent with that observed by Liu and Lin (2018a) for jointly analyzing multiple phenotypes.

243 Second, if we consider a local alternative assuming  $\tau_1^2 \lambda_{max} = o(1)$ , then  $\pi_0 = 1 + o(1)$ ,  $\check{\pi}_0 =$   
 244  $1 + o(1)$ ,  $\pi_1 = 1 + o(1)$ , and  $\check{\pi}_1 = 1 + o(1)$ . As a result,  $T_{ME}$  is at least as powerful as  $T_{12}$  provided  
 245 that  $\varphi_0^2/\check{\varphi}_0^2 = \mathbf{w}'\Sigma_0\mathbf{w}\mathbf{w}'\Sigma_0^{-1}\mathbf{w}/(\mathbf{w}'\mathbf{w})^2 \geq 1$ ,  $\varphi_1^2/\check{\varphi}_1^2 = \text{tr}(\Sigma_0\mathbf{R})^2\text{tr}(\Sigma_0^{-1}\mathbf{R})^2/\text{tr}^2(\mathbf{R}^2) \geq 1$ ,  $\varphi_2/\check{\varphi}_2 =$   
 246  $\frac{\mathbf{w}'\Sigma_0^{-1}\mathbf{R}\Sigma_0^{-1}\mathbf{w}}{\mathbf{w}'\mathbf{R}\mathbf{w}} \cdot \frac{\sqrt{\text{tr}(\Sigma_0\mathbf{R})^2}}{\sqrt{\text{tr}(\Sigma_0^{-1}\mathbf{R})^2}} \geq 1$ . The first two inequalities always hold as long as  $\mathbf{R}$  and  $\Sigma_0$  are  
 247 positive definite symmetric matrices. The last one depends on the specific structures of  $\mathbf{w}$ ,  $\mathbf{R}$ , and  
 248  $\Sigma_0$  which we will exam by means of simulation.

## 249 4 Simulation studies

250 To compare the finite-sample performance of  $T_{ME}$ ,  $\tilde{T}_{ME}$ , and  $T_{12}$ , with  $T_{skato}$ ,  $T_{Minp}$ , and  $T_{Fisher}$ ,  
 251 we conduct extensive simulation studies, examining the effects of different correlation structures  
 252 and signal sparsities. For the purpose of mimicking the rare variants association study scenario to  
 253 obtain the summary statistics,  $\mathbf{s}$  and  $\Sigma_0$ , we follow the individual-level data generating framework  
 254 used in Derkach et al. (2014). We assume  $E(y_i|\mathbf{G}_i) = \beta_0 + \beta_1 G_{i1} + \dots + \beta_J G_{iJ}$ , where  $y_i$  is normally  
 255 distributed with variance  $\sigma^2 = 1$ , and  $G_{ij}$  is Bernoulli with  $Pr(G_{ij} = 1) = p_j$ ,  $i = 1, \dots, n$  and  
 256  $j = 1, \dots, J$ , and  $p_j$  is approximately twice the minor allele frequency of variant  $j$ . Given this set-  
 257 up,  $\mathbf{s} \sim N(\boldsymbol{\mu}, \Sigma_0)$ , where  $\boldsymbol{\mu} = (np_1(1-p_1)\beta_1, \dots, np_J(1-p_J)\beta_J)'$ ,  $\Sigma_0 = \{\sigma_{jk}^2\}_{J \times J}$ ,  $\sigma_{jk}^2 = np_j(1 -$   
 258  $p_j)$  for  $j = k$  and  $\sigma_{jk}^2 = n(p_{jk} - p_j p_k)$  for  $j \neq k$ , and  $p_{jk} = P(G_{ij} = 1, G_{ik} = 1)$ .

259 In the subsequent studies, we consider  $J = 10, 50, 100, 500$ , and  $1000$ ,  $p_j$  randomly drawn  
 260 from  $\text{Unif}(0.005, 0.02)$ ,  $j = 1, \dots, J$ , and  $\boldsymbol{\beta} = \mathbf{0}$  under the null and following various different  
 261 structures under alternatives. For  $\text{diag}\{\sigma_{jj}^{-1}\}\Sigma_0\text{diag}\{\sigma_{jj}^{-1}\}$ , we consider an AR(1) pattern with  
 262 correlation  $\tilde{\rho}$ , and  $\tilde{\rho} = 0.2, 0.5$ , and  $0.8$ . For  $\mathbf{w}$  and  $\mathbf{A}$  in  $T_{skato}$ ,  $T_{Minp}$ ,  $T_{Fisher}$ , and  $T_{12}$ , we choose  
 263 the commonly used  $w_j = 1/\sqrt{p_j(1-p_j)}$  and  $\mathbf{A} = \text{diag}\{w_j^2\}$  without loss of generality. For  $\mathbf{w}$  and



264  $\mathbf{R}$  in  $T_{ME}$  and  $\tilde{T}_{ME}$ , we choose the same  $w_j$  and let  $\mathbf{R} = \mathbf{A}$  for a fair comparison.

## 265 4.1 Type I error

266 To examine the validity of the proposed tests,  $T_{ME}$ ,  $\tilde{T}_{ME}$ , and  $T_{12}$ , we generate  $\mathbf{s}$  from  $N(\mathbf{0}, \mathbf{\Sigma}_0)$ ,  
267 independently,  $10^6$  times for each  $J$  and  $\tilde{\rho}$  combination. Table 2 provides the empirical type I  
268 error rates for  $\alpha = 5\%, 1\%, 0.1\%$ , and  $0.01\%$  estimated based on the  $10^6$  replications for  $\tilde{\rho} = 0.5$ ;  
269 results similar for other  $\tilde{\rho}$  values (see Supplementary Material).  $T_{,asy}$  represents the asymptotic  
270 results based on Theorem 1. For  $T_{,apr}$  based on Theorem 2,  $10^7$  independent random variables  
271  $u_1$  and  $v_j$  are generated for each replication. The results in Table 2 show that for small  $J$ , in  
272 combination with stringent  $\alpha$  level, p-value evaluation based on the asymptotic distributions in  
273 Theorem 1 is not adequate. In that case, the approximate solution in Theorem 2 should be used.

274 For the existing methods,  $T_{skato}$ ,  $T_{Minp}$ , and  $T_{Fisher}$ , we observed in our simulation studies that  
275  $T_{skato}$  is slightly conservative for the  $\alpha$  levels considered regardless of the size of  $J$ ,  $T_{Minp}$  is also  
276 slightly conservative for small  $J$  but has correct test size when  $J > 50$ , and  $T_{Fisher}$  has inflated type  
277 I error when correlation is strong; see supplementary material for detailed simulation results.

## 278 4.2 Power without covariates

279 We consider two different simulation designs to evaluate power. For both designs,  $P_c$ , the propor-  
280 tion of causal variants for a given set of  $J$  variants, is randomly drawn from  $\text{Unif}(0.01, 0.1)$  for the  
281 case of sparse signal, and  $P_c \sim \text{Unif}(0.1, 0.5)$  for moderately sparse case. Among the causal vari-  
282 ants, the proportion of deleterious variants with  $\beta_j > 0$ ,  $P_d \sim \text{Unif}(0.5, 0.75)$ . We note that for each  
283  $P_c$  and  $P_d$  combination, the locations of the signals ( $\beta_j \neq 0$ ) are randomly drawn from  $\{1, 2, \dots, J\}$ ,  
284 without replacement. This randomness helps us to comprehensively explore the effect of different  
285 correlation structures between causal variants, between non-causal variants, as well as between  
286 causal and non-causal variants.

**Table 2: Type I error evaluation.** Empirical test sizes for  $\alpha = 5\%$ ,  $1\%$ ,  $0.1\%$ , and  $0.01\%$ , estimated based on  $10^6$  replications independently simulated under the null. For p-value evaluation,  $T_{\cdot,asy}$  represents using the asymptotic distributions in Theorem 1, and  $T_{\cdot,apr}$  represents using the approximate solution in Theorem 2 with  $10^7$  independent simulated  $N(0, 1)$  variables. Results here are for  $\tilde{\rho} = 0.5$  in  $\Sigma_0$ ; results for other  $\tilde{\rho}$  values are provided in the Supplementary Material.

| $J$  | $\alpha$ | $T_{12,asy}$ | $\tilde{T}_{me,asy}$ | $T_{me,asy}$ | $T_{12,apr}$ | $\tilde{T}_{me,apr}$ | $T_{me,apr}$ |
|------|----------|--------------|----------------------|--------------|--------------|----------------------|--------------|
| 10   | 5%       | 6.1558       | 5.4401               | 5.6556       | 5.7470       | 5.1676               | 5.2226       |
|      | 1%       | 3.1219       | 2.2454               | 2.4281       | 1.7649       | 1.3830               | 1.2969       |
|      | 0.1%     | 1.4531       | 0.7937               | 0.9427       | 0.2079       | 0.1575               | 0.1316       |
|      | 0.01%    | 0.7725       | 0.3260               | 0.4294       | 0.0196       | 0.0158               | 0.0141       |
| 20   | 5%       | 5.6845       | 5.0952               | 5.5795       | 5.4308       | 4.9646               | 5.2198       |
|      | 1%       | 2.5849       | 1.8642               | 2.4312       | 1.6450       | 1.2781               | 1.3667       |
|      | 0.1%     | 1.0219       | 0.5893               | 0.9643       | 0.2212       | 0.1565               | 0.1476       |
|      | 0.01%    | 0.4703       | 0.2167               | 0.4550       | 0.0246       | 0.0162               | 0.0149       |
| 50   | 5%       | 5.1085       | 4.9573               | 5.1317       | 5.0333       | 4.9307               | 4.9875       |
|      | 1%       | 1.9088       | 1.3816               | 1.7082       | 1.4498       | 1.1470               | 1.1475       |
|      | 0.1%     | 0.5952       | 0.3178               | 0.5002       | 0.2103       | 0.1446               | 0.1307       |
|      | 0.01%    | 0.2148       | 0.0852               | 0.1794       | 0.0230       | 0.0165               | 0.0132       |
| 100  | 5%       | 4.9508       | 4.9621               | 5.0064       | 4.923        | 4.9672               | 4.9664       |
|      | 1%       | 1.5279       | 1.2223               | 1.3854       | 1.2788       | 1.0938               | 1.1030       |
|      | 0.1%     | 0.3796       | 0.2207               | 0.3082       | 0.1846       | 0.1428               | 0.1273       |
|      | 0.01%    | 0.1149       | 0.0464               | 0.0831       | 0.025        | 0.0162               | 0.0138       |
| 500  | 5%       | 4.9335       | 4.9757               | 5.0020       | 4.9307       | 4.9759               | 4.9948       |
|      | 1%       | 1.1265       | 1.0426               | 1.0917       | 1.0720       | 1.0112               | 1.0238       |
|      | 0.1%     | 0.1662       | 0.1273               | 0.1547       | 0.1288       | 0.1094               | 0.1130       |
|      | 0.01%    | 0.0332       | 0.0176               | 0.0281       | 0.0202       | 0.0123               | 0.0139       |
| 1000 | 5%       | 4.9841       | 4.9887               | 4.9552       | 4.9743       | 4.9889               | 4.9436       |
|      | 1%       | 1.0475       | 1.0045               | 1.0254       | 1.0151       | 0.9886               | 0.9864       |
|      | 0.1%     | 0.1365       | 0.1127               | 0.1190       | 0.1183       | 0.1065               | 0.0951       |
|      | 0.01%    | 0.0205       | 0.0135               | 0.0162       | 0.0163       | 0.0116               | 0.0109       |

287 Design one follows the approach of Derkach et al. (2014). That is,  $\mathbf{s} \sim N(\boldsymbol{\mu}, \boldsymbol{\Sigma}_0)$ , where  $\boldsymbol{\mu} =$   
 288  $(np_1(1-p_1)\beta_1, \dots, np_J(1-p_J)\beta_J)'$ ,  $n = 500$ ,  $\text{diag}\{\sigma_{jj}^{-1}\}\boldsymbol{\Sigma}_0\text{diag}\{\sigma_{jj}^{-1}\}$  follows the AR(1) model  
 289 with varying  $\tilde{\rho}$ , and  $|\beta_j| \sim \text{Unif}(0.5, 1.5)$  for both the sparse and moderately sparse cases. Design  
 290 two assumes that  $\mathbf{s}$  is drawn from the mixed-effect model (7) with varying magnitudes of  $\boldsymbol{\mu}$  and  $\tau^2$ .  
 291 Specifically,  $\mathbf{s} \sim N(\mathbf{w}^*\boldsymbol{\beta}, \tau^2\mathbf{I}_J + \boldsymbol{\Sigma}_0)$ , where  $\mathbf{w}^* = (np_1(1-p_1)\text{sign}(\beta_1), \dots, np_J(1-p_J)\text{sign}(\beta_J))'$ ,  
 292  $\boldsymbol{\beta}$  represents the common fixed effect of  $\boldsymbol{\beta}$ , and  $\tau^2$  captures the random effect. For this design,  
 293  $\boldsymbol{\beta} \sim \text{Unif}(0.5, 1.5)$  for both the sparse and moderately sparse cases as in design one, and  $\tau^2 \sim$   
 294  $\text{Unif}(1, 2)$ .

295 For both designs, to compare power between methods we focus on  $J = 100$  and  $\alpha = 0.05$   
 296 without loss of generality; results for other parameter values are characteristically similar. The  
 297 empirical power for  $\alpha = 0.05$  are estimated from  $10^3$  independently simulated replicates, and using  
 298 the empirical critical values obtained from  $10^4$  corresponding null replicates. As the performances  
 299 under sparse and moderate sparse cases share similar patterns, we present the results for the sparse  
 300 case here and the other results in the supplementary material.

301 Under simulation design one and the sparse signal case, Figures 1-2 show the empirical power  
 302 of the proposed test statistics  $T_{12}$ ,  $\tilde{T}_{ME}$ , and  $T_{ME}$  as compared to  $T_{skato}$ ,  $T_{Minp}$ , and  $T_{Fisher}$ , re-  
 303 spectively, for  $\tilde{\rho} = 0.5$  and  $\tilde{\rho} = 0.2$ ; see supplementary material for  $\tilde{\rho} = 0.8$ . In each figure,  
 304 there are 200 randomly simulated models where  $p_j \sim \text{Unif}(0.005, 0.02)$ ,  $P_c \sim \text{Unif}(0.01, 0.1)$ ,  
 305  $P_d \sim \text{Unif}(0.5, 0.75)$ , and  $|\beta_j| \sim \text{Unif}(0.5, 1.5)$ ; see supplementary material for the moderately  
 306 sparse case where  $P_c \sim \text{Unif}(0.1, 0.5)$ .

307 Based on the results in Figures 1-2, first we note that when the correlation among variants is  
 308 relatively strong (e.g.  $\tilde{\rho} = 0.5$  in Figures 1 and  $\tilde{\rho} = 0.8$  in supplementary material),  $T_{ME}$  derived  
 309 from the proposed mixed-effect regression model, using  $\boldsymbol{\Sigma}_0^{-1}\mathbf{s}$  instead of  $\mathbf{s}$ , increases power. How-  
 310 ever, this approach may not be advantageous when there is only weak correlation in conjunction  
 311 with sparse signal (e.g.  $\tilde{\rho} = 0.2$  in Figures 2) as discussed in Section 3.2. Interestingly, the new  
 312 test  $T_{12}$  (which has the same structure as  $T_{ME}$  but uses  $\mathbf{s}$ ) and test  $\tilde{T}_{ME}$  (uses  $\mathbf{C}\mathbf{s}$ , where  $\mathbf{C}'\boldsymbol{\Sigma}\mathbf{C} = \mathbf{I}_J$ )

313 have comparable power with  $T_{skato}$ , but without the need to search for the ‘optimal’  $\rho$ . Our sim-  
314 ulation results also confirm that the three existing hybrid tests,  $T_{skato}$ ,  $T_{Minp}$ , and  $T_{Fisher}$ , largely  
315 have similar performance, where  $T_{skato}$  and  $T_{Minp}$  perform more similar with each other than with  
316  $T_{Fisher}$ .

317 The results for simulation design two and under the sparse case are shown in Figures 3-4,  
318 respectively, for  $\tilde{\rho} = 0.5$  and  $\tilde{\rho} = 0.2$ ; see supplementary material for  $\tilde{\rho} = 0.8$ . In each figure,  
319 there are 200 randomly simulated models where  $p_j$ ,  $P_c$ , and  $P_d$  are simulated as in design one,  
320 while  $\beta \sim \text{Unif}(0.5, 1.5)$  and  $\tau^2 \sim \text{Unif}(1, 2)$ ; see supplementary material for additional results  
321 using other parameter values. As expected, when  $\mathbf{s}$  follows a mixed-effect model (7), the advantage  
322 of the proposed  $T_{ME}$  is enhanced. In this case, power of  $T_{ME}$  is considerably higher than the other  
323 tests even when  $\tilde{\rho} = 0.2$  for most of the 200 models simulated (Figures 4). We also note that in our  
324 power studies, we used the sub-optimal  $w_j = 1/\sqrt{p_j(1-p_j)}$  and  $\mathbf{R} = \text{diag}\{w_j^2\}$ . Performance of  
325  $T_{ME}$  can be further improved by using the oracle  $w_j = np_j(1-p_j)\text{sign}(\beta_j)$  and  $\mathbf{R} = \mathbf{I}$ .

### 326 4.3 Power with covariates

327 We now briefly study the effect of incorporating variant-specific additional information  $\mathbf{z} = (z_1, \dots, z_J)'$ .  
328 As discussed before, although one may revise  $w_j$  to be proportional to  $z_j$ , in addition to MAF,  
329 it is not immediately clear how to choose an ‘optimal’ weighting function. Thus, we only study  
330 the proposed  $T_{ME, cov}$ , derived directly from the regression model (12), and we consider simulation  
331 design two only. Without loss of generality, we assume  $z_j$  to be an indicator variable, for exam-  
332 ple the variant being non-synonymous ( $z_j = 1$ ) or synonymous ( $z_j = 0$ ). For causal variants we  
333 let  $Pr(z_j = 1) = 0.5$ , and for non-causal variants  $Pr(z_j = 1) = 0$ . We consider both the case of  
334 informative  $\mathbf{z}$  ( $\theta \neq 0$  in model (12)) and the case of uninformative  $\mathbf{z}$  ( $\theta = 0$ ).

335 Figure 5 shows the results for  $J = 100$  and  $\tilde{\rho} = 0.5$  under the sparse signal case where  $P_c = 0.1$ ;  
336  $P_d \sim \text{Unif}(0.5, 1)$  and  $p_j \sim \text{Unif}(0.005, 0.02)$ . Because of the additional information available  
337 from  $\mathbf{z}$ , we decrease  $\beta$  to be drawn from  $\text{Unif}(0.1, 1)$  and choose  $\tau^2 = 0$ . When  $\mathbf{z}$  is informative,

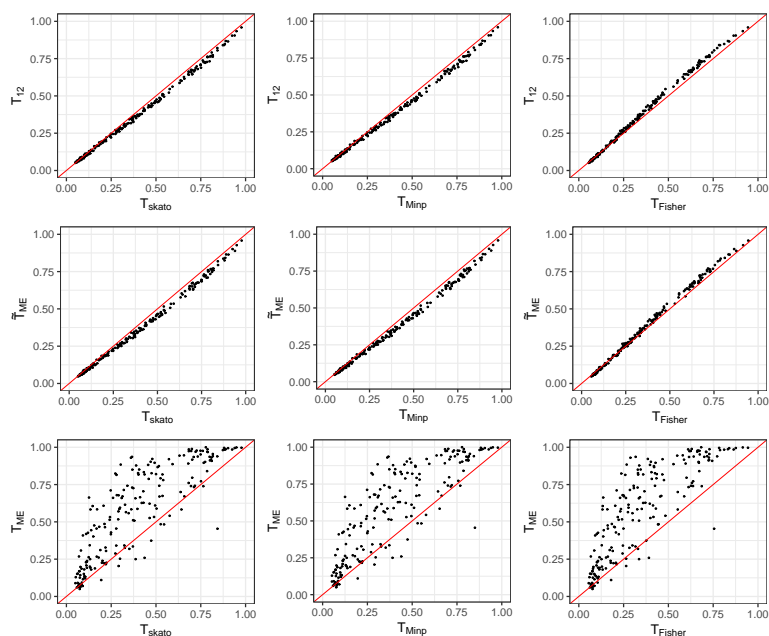

Figure 1: **Comparison of power for sparse signals and  $\tilde{\rho} = 0.5$  based on design ONE.** Compare  $T_{12}$ ,  $\tilde{T}_{ME}$ ,  $T_{ME}$ ,  $T_{Fisher}$ ,  $T_{Minp}$  and  $T_{skato}$  using 200 alternative models with sparse signals simulated based on design one.  $J = 100$  and the proportion of the causal variants varies from 1% to 10%. Sample size  $n = 500$  and  $\alpha = 0.05$ .

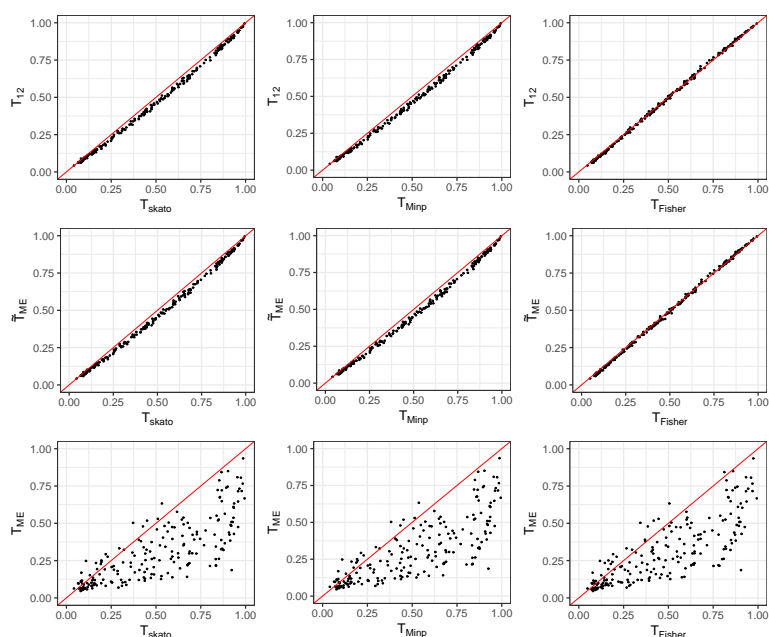

Figure 2: **Comparison of power for sparse signals and  $\tilde{\rho} = 0.2$  based on design ONE.** Compare  $T_{12}$ ,  $\tilde{T}_{ME}$ ,  $T_{ME}$ ,  $T_{Fisher}$ ,  $T_{Minp}$  and  $T_{skato}$  using 200 alternative models with sparse signals simulated based on design one.  $J = 100$  and the proportion of the causal variants varies from 1% to 10%. Sample size  $n = 500$  and  $\alpha = 0.05$ .

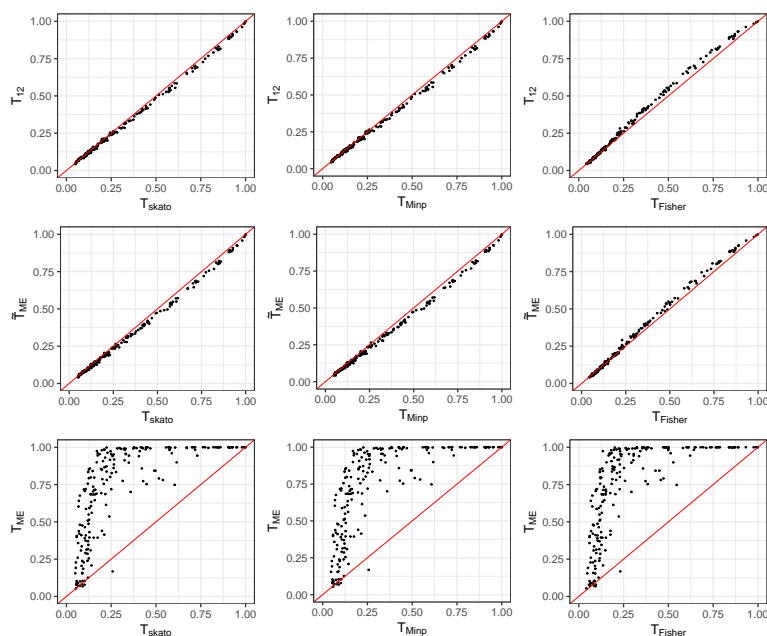

Figure 3: **Comparison of power for sparse signals and  $\tilde{\rho} = 0.5$  based on design TWO.** Compare  $T_{12}$ ,  $\tilde{T}_{ME}$ ,  $T_{ME}$ ,  $T_{Fisher}$ ,  $T_{Minp}$  and  $T_{skato}$  using 200 alternative models with sparse signals simulated based on design two.  $J = 100$  and the proportion of the causal variants varies from 1% to 10%. Sample size  $n = 500$  and  $\alpha = 0.05$ .

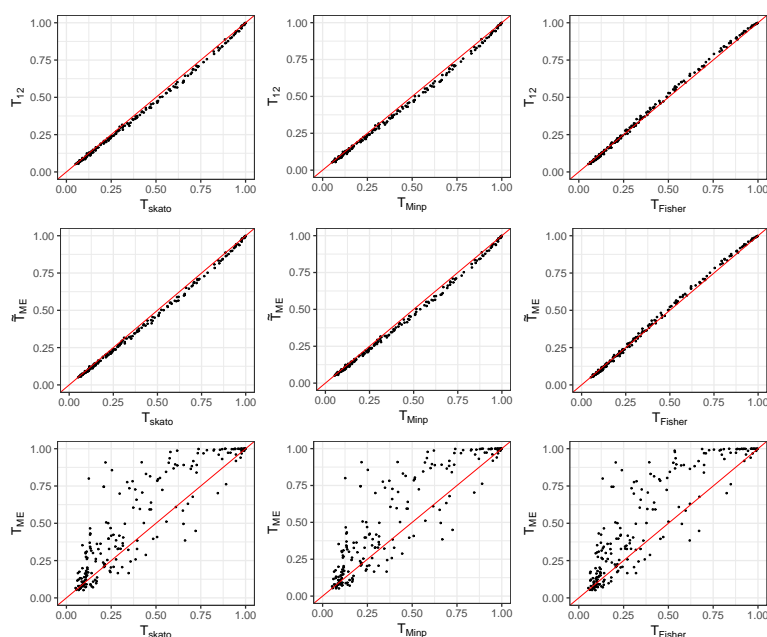

Figure 4: **Comparison of power for sparse signals and  $\tilde{\rho} = 0.2$  based on design TWO.** Compare  $T_{12}$ ,  $\tilde{T}_{ME}$ ,  $T_{ME}$ ,  $T_{Fisher}$ ,  $T_{Minp}$  and  $T_{skato}$  using 200 alternative models with sparse signals simulated based on design two.  $J = 100$  and the proportion of the causal variants varies from 1% to 10%. Sample size  $n = 500$  and  $\alpha = 0.05$ .

338  $\theta \sim \text{Unif}(1,4)$ . As expected, there can be substantial power gain when incorporating informa-  
 339 tive covariate information (left plot in Figure 5), at the cost of slightly reduced power when  $\mathbf{z}$  is  
 340 uninformative (right plot in Figure 5).

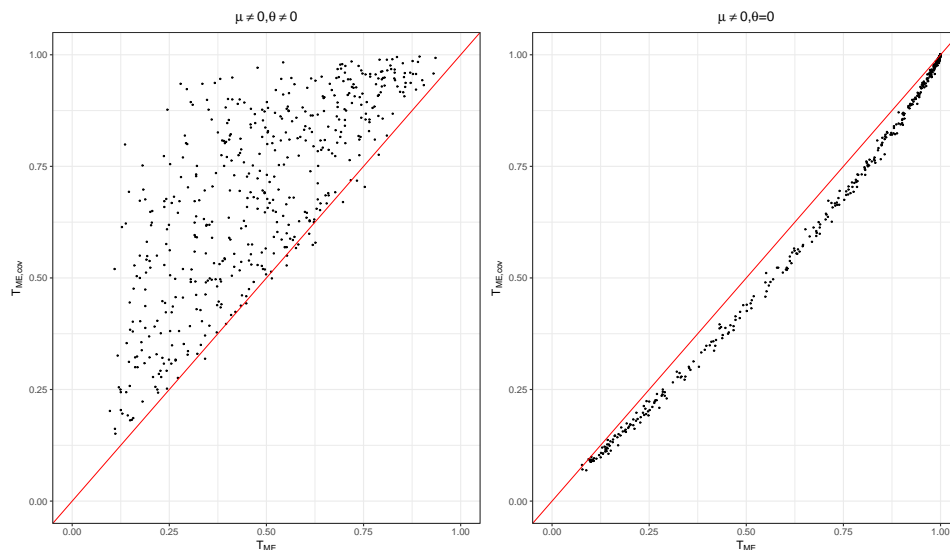

Figure 5: **Power with and without covariates.** Compare  $T_{ME,cov}$  and  $T_{ME}$  using 500 alternative models with sparse signals simulated based on design two.  $J = 100$ ,  $P_c = 0.1$ ,  $P_d \sim U(0.5, 1)$ ,  $\beta \sim U(0.1, 1)$ ,  $\tilde{\rho} = 0.5$ . Sample size  $n = 500$  and  $\alpha = 0.05$ .

## 341 5 Applications

342 In this section, we examine nine test statistics through two data applications. The nine tests exam-  
 343 ined include the four new methods,  $T_{ME,cov}$ ,  $T_{ME}$ ,  $\tilde{T}_{ME}$ , and  $T_{12}$ , and the existing methods,  $T_{skato}$ ,  
 344  $T_{Minp}$ ,  $T_{Fisher}$ , as well as  $T_1$  and  $T_2$  for completeness; see Table 1 for a summary of the different  
 345 tests. In the implementation of  $T_{ME,cov}$ , we use variants being non-synonymous or synonymous,  
 346 annotated using the UCSC genome browser at <https://genome.ucsc.edu/>, as the variant-specific  
 347 information.

348 The first application highlights the advantage of the proposed  $T_{ME}$  in the presence of high  
 349 or moderately high correlation between variants, and it also demonstrates that the method is not

350 limited to analyses of rare variants. The second application revisits the genetic analysis workshop  
351 17 (GAW17) rare variants data previously studied by Derkach et al. (2014). This application  
352 reveals the benefit of incorporating additional variant-specific information using  $T_{ME,cov}$ , derived  
353 from the proposed summary statistic-based mixed-effect regression model (12).

## 354 **5.1 Cystic Fibrosis (CF) data - common variants**

355 Cystic Fibrosis is a life-limiting genetic condition for which lung function is a primary co-morbidity  
356 of interest. To indirectly study gene-environment interactions, Soave et al. (2015) proposed a joint  
357 location-scale (JLS) test and applied it to lung function measures in CF individuals,  $n = 1,409$   
358 from a Canadian sample and  $n = 1,232$  from a French sample. They discovered and replicated  
359 the significance of the SLC9A3 complex set (35 common variants from four genes) based on the  
360 JLS test. However, the signal appears to come from the scale (interaction) component. For the  
361 traditional location (mean) test based on  $T_2$ , the SLC9A3 complex set was only significant in the  
362 Canadian sample but not replicated in the French sample. Here we exam the performance of the  
363 nine tests applied to the French sample.

364 To implement all the tests we use  $\mathbf{w} = \mathbf{1}$  and  $\mathbf{A} = \mathbf{I}$ , and  $\mathbf{R} = \mathbf{I}$  for fair comparison, since we did  
365 not find that MAF-dependent weighting enhance the performance of the tests. Because the number  
366 of variants of interest here is not large enough for using the asymptotic distributions, we obtain  
367 empirical p-values for all tests based on  $10^4$  permutation replicates.

368 Results in Table 3 show that only some of the genes appear to be truly associated with lung  
369 function in CF. For SLC9A3, all tests have suggestive evidence with  $T_1$  having p-value  $< 0.05$ . For  
370 SLC9A3R1, benefiting from the correlation structure (Figure S9), the proposed  $T_{ME}$  and  $T_{ME,cov}$   
371 (and  $\tilde{T}_{ME}$ ), which use  $\Sigma_0^{-1}\mathbf{s}$  (and  $\mathbf{C}\mathbf{s}$ ) instead of  $\mathbf{s}$ , are significant. When jointly analyzing all four  
372 genes in the SLC9A3 complex set, none of the tests is statistically significant but  $\tilde{T}_{ME}$  has the  
373 smallest p-value. A larger sample is needed to make a definitive conclusion of true association.  
374 The covariate information (non-synonymous vs. synonymous) appear not to be informative here,



375 but the performance of  $T_{ME,cov}$  is similar to that of  $T_{ME}$ .

Table 3: Empirical p-values of the tests in the CF data application.

| Gene           | $J$ | Empirical p-value |        |             |            |              |          |                  |          |              |
|----------------|-----|-------------------|--------|-------------|------------|--------------|----------|------------------|----------|--------------|
|                |     | $T_1$             | $T_2$  | $T_{skato}$ | $T_{Minp}$ | $T_{Fisher}$ | $T_{12}$ | $\tilde{T}_{ME}$ | $T_{ME}$ | $T_{ME,cov}$ |
| SLC9A3         | 7   | 0.0443            | 0.1198 | 0.079       | 0.0783     | 0.0541       | 0.0718   | 0.0586           | 0.0886   | 0.0860       |
| EZR            | 10  | 0.2192            | 0.6856 | 0.3241      | 0.3209     | 0.3897       | 0.239    | 0.3602           | 0.3473   | 0.3474       |
| SLC9A3R2       | 10  | 0.804             | 0.5951 | 0.6965      | 0.6984     | 0.709        | 0.9037   | 0.7999           | 0.9683   | 0.8791       |
| SLC9A3R1       | 8   | 0.0999            | 0.1103 | 0.1471      | 0.1656     | 0.0846       | 0.1042   | 0.0250           | 0.0243   | 0.0243       |
| 4-gene jointly | 35  | 0.8372            | 0.3079 | 0.4749      | 0.4738     | 0.5671       | 0.9261   | 0.1142           | 0.1710   | 0.1709       |

## 376 5.2 The Genetic Analysis Workshop 17 (GAW17) data - rare variants

377 Here we apply the method to the GAW17 data provided by the 1000 Genomes Project (Consortium  
378 et al., 2010), focusing on the simulated quantitative trait Q2. The phenotype Q2 is influenced by  
379 72 variants in 13 genes but not by environmental factors, and the genotypes of these variants are  
380 obtained from a ‘mini-exome’ next-generation sequencing experiment. Available to us are 200  
381 replicates, simulated based on a true phenotype-genotype association model determined by the  
382 GAW17 study group but blinded to this analysis. We consider  $n = 321$  unrelated Asian samples  
383 (Han Chinese, Denver Chinese, and Japanese) and use only variants with MAF less than 0.05. The  
384 description of the variants is provided in Table 4. Among the 13 genes, GCKR is not analyzed since  
385 only one variant remained after variant screening. VNN1 does not have any causal rare variants  
386 but is kept for negative control.

387 For each of the 200 alternative replicates, we calculate the empirical p-values (based on  $10^4$   
388 permutation replicates) for the nine test statistics. For each test, the power for  $\alpha = 0.05$  is estimated  
389 as the proportion of the 200 replicates for which the empirical p-values  $\leq 0.05$ . We separate the 11  
390 genes into three categories based on power as in Derkach et al. (2014) (which examined  $T_1$  and  $T_2$ )

391 and Derkach et al. (2013) (which examined  $T_1$ ,  $T_2$ ,  $T_{Minp}$ , and  $T_{Fisher}$ ), and we also jointly analyze  
392 all genes within each category.

393 In this application, because the correlation is weak among variants (Figure S10), we anticipate  
394 that methods relies on  $\mathbf{s}$  will have better power than those based on  $\Sigma_0^{-1}\mathbf{s}$  or  $\mathbf{C}\mathbf{s}$ . Indeed, results in  
395 Table 4 show that  $T_{12}$  has better performance than  $T_{ME}$  and  $\tilde{T}_{ME}$ . However, this application clearly  
396 demonstrate the potential of incorporating informative covariates. For example, the power of an-  
397 alyzing RARB, PLAT and VLDLR is significantly improved using  $T_{ME,cov}$ , at the cost of slightly  
398 reduced performance if the included covariate is not (detectably) informative. Interestingly,  $T_{Fisher}$   
399 has comparable performance as  $T_{12}$ , and both outperform  $T_{skato}$  in almost all cases. Although the  
400 individual  $T_1$  and  $T_2$  tests may have the highest power for certain genes, the robustness of the hybrid  
401 tests is evident based on the overall performance exhibited in Table 4.

## 402 6 Discussion

403 In this paper, we considered a summary statistic-based regression framework to analyze a set of  $J$   
404 variants simultaneously. As delineated in Table 1, the proposed approach is flexible and adaptive.  
405 The score test derived from the fixed-effect model,  $T_{FE}$ , unifies the linear class of tests (also known  
406 as the burden tests),  $T_1$ , derived from models requiring individual-level data, while  $T_{RE}$  from the  
407 random-effect model connects the quadratic class or variance component tests,  $T_2$ . Further, the  
408 score test derived from the random-effect model offers a new hybrid test,  $T_{ME}$ , that naturally ag-  
409 gregates information from  $T_{FE}$  and  $T_{RE}$ .

410 In contrast to the well-known SKAT-O, it is worth emphasizing two notable differences. First,  
411 the proposed framework aggregates evidence across  $J$  variants based on  $\Sigma_0^{-1}\mathbf{s}$ , a precision matrix-  
412 based transformation of the score vector, that can increase power for sparse alternatives (Fan et al.,  
413 2013; Cai et al., 2014). Secondly, when additional variant-specific information is available, it is  
414 straightforward to derive  $T_{ME,cov}$  that accounts for covariate effects. We have demonstrated these

Table 4: Empirical power of the tests in the GAW17 data application.

| Gene                                                                          | $J_C$ | $J_N$ | Empirical Power |       |             |            |              |          |                  |          |              |
|-------------------------------------------------------------------------------|-------|-------|-----------------|-------|-------------|------------|--------------|----------|------------------|----------|--------------|
|                                                                               |       |       | $T_1$           | $T_2$ | $T_{skato}$ | $T_{Minp}$ | $T_{Fisher}$ | $T_{12}$ | $\tilde{T}_{ME}$ | $T_{ME}$ | $T_{ME,cov}$ |
| 7 genes for which the maximum power is 10% or more                            |       |       |                 |       |             |            |              |          |                  |          |              |
| SIRT1                                                                         | 4     | 7     | 0.44            | 0.385 | 0.455       | 0.43       | 0.495        | 0.5      | 0.315            | 0.285    | 0.285        |
| BCHE                                                                          | 6     | 9     | 0.29            | 0.39  | 0.405       | 0.39       | 0.435        | 0.445    | 0.45             | 0.46     | 0.41         |
| PDGFD                                                                         | 3     | 5     | 0.295           | 0.385 | 0.385       | 0.38       | 0.425        | 0.45     | 0.37             | 0.31     | 0.26         |
| SREBF1                                                                        | 4     | 5     | 0.495           | 0.25  | 0.440       | 0.440      | 0.445        | 0.400    | 0.440            | 0.405    | 0.355        |
| RARB                                                                          | 1     | 5     | 0.06            | 0.135 | 0.095       | 0.110      | 0.085        | 0.090    | 0.090            | 0.100    | 0.215        |
| PLAT                                                                          | 4     | 7     | 0.13            | 0.125 | 0.105       | 0.100      | 0.135        | 0.12     | 0.115            | 0.13     | 0.165        |
| VLDLR                                                                         | 4     | 3     | 0.11            | 0.085 | 0.100       | 0.095      | 0.115        | 0.115    | 0.110            | 0.110    | 0.16         |
| 7-gene jointly                                                                | 26    | 41    | 0.935           | 0.765 | 0.94        | 0.935      | 0.945        | 0.94     | 0.79             | 0.765    | 0.765        |
| 4 genes for which the maximum power is 10% or less                            |       |       |                 |       |             |            |              |          |                  |          |              |
| VNN3                                                                          | 2     | 2     | 0.035           | 0.04  | 0.035       | 0.035      | 0.04         | 0.04     | 0.04             | 0.04     | 0.035        |
| INSIG1                                                                        | 3     | 1     | 0.05            | 0.03  | 0.03        | 0.03       | 0.035        | 0.035    | 0.025            | 0.025    | 0.015        |
| LPL                                                                           | 1     | 3     | 0.03            | 0.065 | 0.035       | 0.035      | 0.04         | 0.035    | 0.025            | 0.035    | 0.050        |
| VWF                                                                           | 1     | 3     | 0.025           | 0.01  | 0.01        | 0.01       | 0.015        | 0.01     | 0.035            | 0.04     | 0.045        |
| 4-gene jointly                                                                | 7     | 9     | 0.075           | 0.01  | 0.06        | 0.06       | 0.055        | 0.045    | 0.055            | 0.055    | 0.045        |
| 1 gene for which there is no rare causal variants, used as a negative control |       |       |                 |       |             |            |              |          |                  |          |              |
| VNN1                                                                          | 0     | 3     | 0.015           | 0.045 | 0.045       | 0.045      | 0.035        | 0.04     | 0.04             | 0.04     | 0.045        |

415 features of the proposed method using both analytical results and empirical studies.

416 To exploit the assumption of signal sparsity, various supremum-type tests have been proposed  
417 including the generalized higher criticism (Barnett et al., 2017) for sparse signals, and most re-  
418 cently the generalized Berk-Jones statistic (Sun and Lin, 2017) for moderate sparse signals. These  
419 methods, tailored for common variants, are not easy to adjust for additional variant-specific in-  
420 formation when individual-level data are not available. See Lin and Zeng (2010) for a general  
421 discussion of the relative efficiency between mega- and meta-analysis.

422 The proposed set-based testing framework is a general one, and it can be used for other set-  
423 tings such as pleiotropy studies of multiple phenotypes, where the analytical unit is each of the  
424 phenotypes. In that context, Liu and Lin (2018b) also proposed a summary statistic-based linear  
425 mixed-effect regression model, but they focused on the special case of  $\mathbf{w} = \mathbf{1}$  and  $\mathbf{R} = \mathbf{I}$ . In ad-  
426 dition, Liu and Lin (2018b) derived two score test statistics, respectively, for testing  $\mu = 0$  and  
427  $\tau^2 = 0$  *separately*, then considered different ways to combine the evidence including SKAT-O type  
428 of statistics. In contrast, we derive  $T_{ME}$  from testing  $\mu = 0$  and  $\tau^2 = 0$  *jointly*, and the weight-  
429 ing factors are inherently justified. We also study the asymptotic properties of the proposed tests  
430 under the null and alternatives, in addition to the study of covariate adjustments when only variant-  
431 specific information is available.

432 The proposed method can also be used for the study of polygenic risk score (PRS)(Purcell  
433 et al., 2009), and the connection between PRS and burden type of tests ( $T_1$ ) has been noted by Pan  
434 et al. (2015). In principle,  $T_{ME}$  can overcome the poor statistical efficiency of  $T_1$  as adopted in  
435 the PRS test. However, the estimation of large precision matrices can be challenges and requires  
436 special considerations (Fan et al., 2016). The link between  $T_1$  and existing PrediXcan (Gamazon  
437 et al., 2015) for association and tissue-specific gene-expression data integration has also been noted  
438 (Xu et al., 2017). The performance of  $T_{ME}$  in this setting and comparison with other concurrently  
439 developed newer methods are of our future research interest.

440 Fix-, random-, and mixed-effect models for summary statistics have been studied for meta-

441 analysis of GWAS (Han and Eskin, 2011). In that context, a likelihood ratio test was implemented  
442 for the mixed-effect model, and the resulting test is also known as the new random-effect meta-  
443 analysis. The original test of Han and Eskin (2011) was designed for meta-analysis of independent  
444 studies, and a modified procedure has since been developed by Lee et al. (2017) to account for  
445 correlations between studies but not covariate effects. Comparison between the two approaches  
446 for meta-analysis and other studies warrants future investigations.

## 447 **Acknowledgements**

448 We thank Dr. Lisa J. Strug and her lab, and Dr. Harriet Corvol for providing the cystic fibrosis  
449 application data, and we thank the Genetic Analysis Workshop 17 (GAW17) committee and the  
450 1000 Genomes Project for providing the GAW17 application data. We would also like to thank Dr.  
451 Andriy Derkach for helpful discussions. YZ is a trainee of the CIHR STAGE (Strategic Training  
452 in Advanced Genetic Epidemiology) training program at the University of Toronto. This research  
453 is funded by the Natural Sciences and Engineering Research Council of Canada (NSERC, RGPIN-  
454 04934 and RGPAS-522594), the Canadian Institutes of Health Research (CIHR, MOP-310732),  
455 and the University of Toronto McLaughlin Centre Accelerator Grants in Genomic Medicine (MC-  
456 2019-15).

## 457 **References**

- 458 Barnett, I., R. Mukherjee, and X. H. Lin, 2017: The generalized higher criticism for testing snp-set  
459 effects in genetic association studies. *J. Amer. Statist. Assoc.*, **112**, 64–76.
- 460 Cai, T. T., W. Liu, and Y. Xia, 2014: Two-sample test of high dimensional means under depen-  
461 dence. *J. R. Statist. Soc. B*, **76**, 349–372.
- 462 Consortium, . G. P., and Coauthors, 2010: A map of human genome variation from population-  
463 scale sequencing. *Nature*, **467 (7319)**, 1061.
- 464 Derkach, A., J. F. Lawless, and L. Sun, 2013: Robust and powerful tests for rare variants using  
465 fisher’s method to combine evidence of association from two or more complementary tests.  
466 *Genet. Epidemiol.*, **37**, 110–121.
- 467 Derkach, A., J. F. Lawless, and L. Sun, 2014: Pooled association tests for rare genetic variants: a  
468 review and some new results. *Statistical Science*, **29**, 302–321.
- 469 Donoho, D., and J. Jin, 2004: Higher criticism for detecting sparse heterogeneous mixtures. *Ann.*  
470 *Statist.*, **32**, 962–994.
- 471 Fan, J., Y. Liao, and H. Liu, 2016: An overview of the estimation of large covariance and precision  
472 matrices. *The Econometrics Journal*, **19**, 1–32.
- 473 Fan, Y. Y., J. S. Jin, and Z. G. Yao, 2013: Optimal classification in sparse gaussian graphic model.  
474 *Ann. Statist.*, **41**, 2537–2571.
- 475 Finucane, H. K., and Coauthors, 2015: Partitioning heritability by functional annotation using  
476 genome-wide association summary statistics. *Nature genetics*, **47 (11)**, 1228–1235.
- 477 Gamazon, E. R., and Coauthors, 2015: A gene-based association method for mapping traits using  
478 reference transcriptome data. *Nature Genetics*, **47**, 1091–1098.

- 479 Hall, P., and J. Jin, 2010: Innovated higher criticism for detecting sparse signals in correlated noise.  
480 *Ann. Statist.*, **38**, 1686–1732.
- 481 Han, B., and E. Eskin, 2011: Random-effects model aimed at discovering associations in meta-  
482 analysis of genome-wide association studies. *Am. J. Hum. Genet.*, **88**, 586–598.
- 483 Ionita-Laza, I., K. McCallum, B. Xu, and J. Buxbaum, 2016: A spectral approach integrating  
484 functional genomic annotations for coding and noncoding variants. *Nature Genetics*, **48**, 214–  
485 220.
- 486 Lee, C. H., E. Eskin, and B. Han, 2017: Increasing the power of meta-analysis of genome-wide  
487 association studies to detect heterogeneous effects. *Bioinformatics*, **33**, 379–388.
- 488 Lee, S., G. Abecasis, M. Boehnke, and X. Lin, 2014: Rare variant association analysis: study  
489 designs and statistical tests. *Am. J. Hum. Genet.*, **95**, 5–23.
- 490 Lee, S., M. C. Wu, and X. Lin, 2012: Optimal tests for rare variant effects in sequencing association  
491 studies. *Biostatistics*, **13**, 762–775.
- 492 Li, B., and S. M. Leal, 2008: Methods for detecting associations with rare variants for common  
493 diseases: application to analysis of sequence data. *Am. J. Hum. Genet.*, **83**, 311–321.
- 494 Lin, D., and D. Zeng, 2010: On the relative efficiency of using summary statistics versus  
495 individual-level data in meta-analysis. *Biometrika*, **97**, 321–332.
- 496 Liu, Z. H., and X. H. Lin, 2018a: A geometric perspective on the power of principal component  
497 association tests in multiple phenotype studies. *J. Amer. Statist. Assoc.*
- 498 Liu, Z. H., and X. H. Lin, 2018b: Multiple phenotype association tests using summary statistics in  
499 genome-wide association studies. *Biometrics*, **74**, 165–175.

- 500 Madsen, B., and S. Browning, 2009: A groupwise association test for rare mutations using a  
501 weighted sum statistic. *PLoS Genetics*, **5**, e1000384.
- 502 Morgenthaler, S., and W. Thilly, 2007: A strategy to discover genes that carry multi-allelic or  
503 mono-allelic risk for common diseases: a cohort allelic sums test (cast). *Mutation Research*,  
504 **615**, 28–56.
- 505 Neale, B. M., and Coauthors, 2011: Testing for an unusual distribution of rare variants. *PLoS*  
506 *Genetics*, **7**, e1001322.
- 507 Pan, W., 2009: Asymptotic tests of association with multiple snps in linkage disequilibrium. *Genet.*  
508 *Epidemiol.*, **33**, 497–507.
- 509 Pan, W., Y. M. Chen, and P. Wei, 2015: Testing for polygenic effects in genome-wide association  
510 studies. *Genet. Epidemiol.*, **39**, 306–316.
- 511 Purcell, S. M., N. R. Wray, J. L. Stone, P. M. Visscher, M. C. O'donovan, P. F. Sullivan, and  
512 P. Sklar, 2009: Common polygenic variation contributes to risk of schizophrenia and bipolar  
513 disorder. *Nature*, **460 (7256)**, 748–752.
- 514 Soave, D., and Coauthors, 2015: A joint location-scale test improves power to detect associated  
515 snps, gene sets, and pathways. *Am. J. Hum. Genet.*, **97**, 125–138.
- 516 Sun, R., and X. H. Lin, 2017: Set-based tests for genetic association using the generalized berk-  
517 jones statistic. *arXiv:1710.02469*.
- 518 Wu, S. C. T. L. Y. B. M., M. C. and Lee, and X. Lin, 2011: Rare-variant association testing for  
519 sequencing data with the sequence kernel association test. *Am. J. Hum. Genet.*, **89**, 82–93.
- 520 Xu, G. J., L. F. Lin, P. Wei, and W. Pan, 2016: An adaptive two-sample test for high-dimensional.  
521 *Biometrika*, **103**, 609–624.



522 Xu, Z., C. Wu, P. Wei, and W. Pan, 2017: A powerful framework for integrating eqtl and gwas  
523 summary data. *Genetics*, **207**, 893–902.
